# Supplementary material for: Transcriptome Profiling and Expression Localization of Key Sex-Related Genes in a Socially-Controlled Hermaphroditic Clownfish, Amphiprion clarkii
Source: Int J Mol Sci. 2022 Aug 13;23(16):9085. doi: 10.3390/ijms23169085 (PMC9409170; doi:10.3390/ijms23169085)
Supplement: Supplementary file 1 [file ijms-23-09085-s001.zip › Supplementary figures.pdf]

**Figure S1.** The mRNA and amino acid sequences of *Ac\_dmr1*. The DM domain is boxed in red.

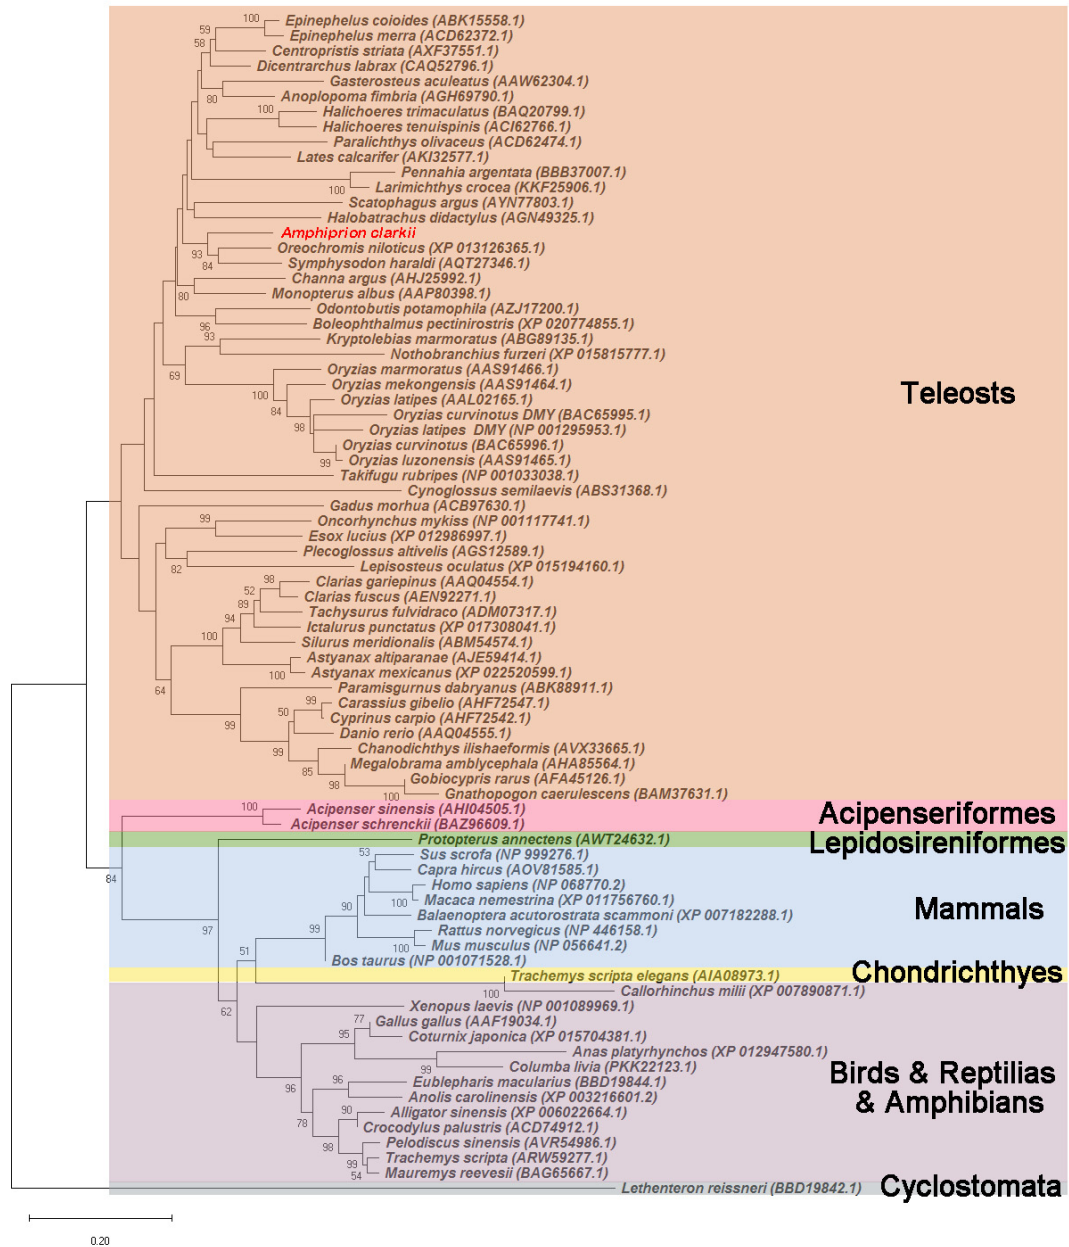

**Figure S2.** Phylogenetic tree based on Dmrt1 amino acid sequences.

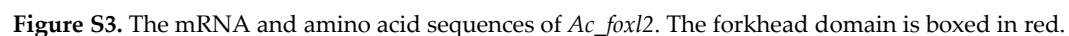

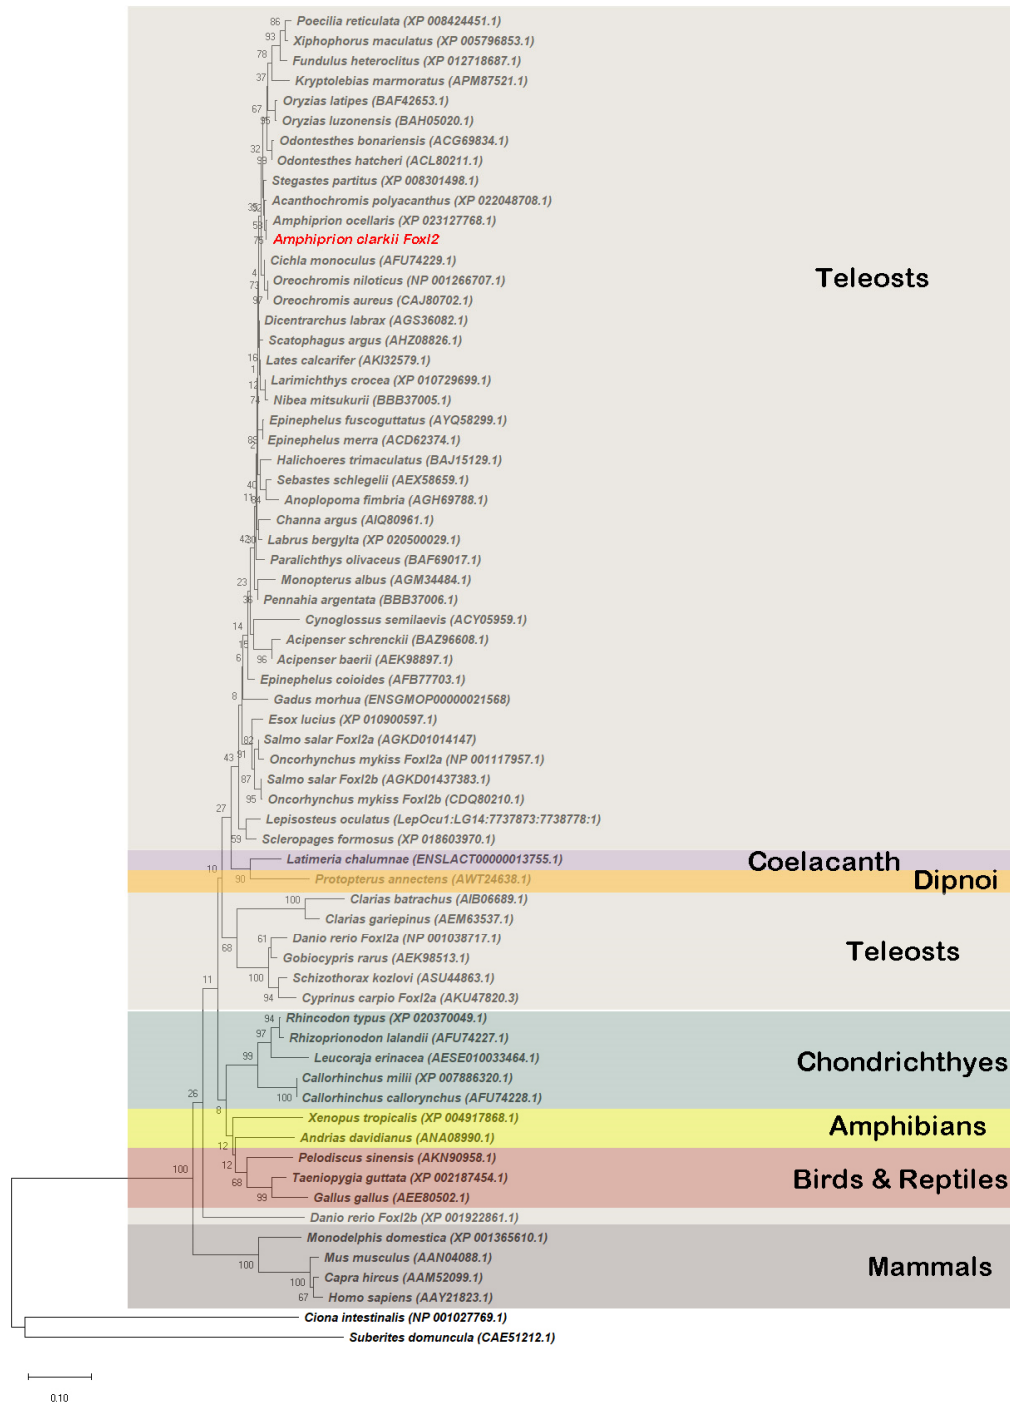

**Figure S4.** Phylogenetic tree based on Foxl2 amino acid sequences.
