# Supplementary material for: Transcriptome Profiling and Expression Localization of Key Sex-Related Genes in a Socially-Controlled Hermaphroditic Clownfish, Amphiprion clarkii
Source: Int J Mol Sci. 2022 Aug 13;23(16):9085. doi: 10.3390/ijms23169085 (PMC9409170; doi:10.3390/ijms23169085)
Supplement: Supplementary file 1 [file ijms-23-09085-s001.zip › Table S1. Primers used in this study.xlsx]

## Sheet: Table S1
Table S1. Primers used in this study
Gene	Gene_id	Primer Sequence（5’-3’）	Usage
cyp19a1a_RT-qPCR_F	ENSAOCG00000017919	GGTGGAGGTTTGCGTCTCG	RT-qPCR
cyp19a1a_RT-qPCR_R		GGCTTTCTATGGCATCTTGTAGCT
foxl2_RT-qPCR_F	ENSAOCG00000023782	GAAGCCATCAGTACGCATCAGG	RT-qPCR
foxl2_RT-qPCR_R		GCAAGGTCATCAATGTCTATCCC
nr0b1_RT-qPCR_F	ENSAOCG00000023217	TGTGACCGCCGAGGAGCAA	RT-qPCR
nr0b1_RT-qPCR_R		CGAGTCCCAGCACGAGCAGA
wnt4a_RT-qPCR_F	ENSAOCG00000002497	GAATATGCTTTGCGGTGCGT	RT-qPCR
wnt4a_RT-qPCR_R		GACGGTTGCGAAACTGGAAC
hsd3b7_RT-qPCR_F	ENSAOCG00000003673	CTCTCCTCCCTCCTCTGACTT	RT-qPCR
hsd3b7_RT-qPCR_R		TAAATCGGGGTCGACGTGTT
nr5a1a_RT-qPCR_F	ENSAOCG00000003623	CCGTTTATAGACATCCTCCATCCG	RT-qPCR
nr5a1a_RT-qPCR_R		GCTCTTCCAGGTCGTCGTCATAC
dmrt1_RT-qPCR_F	ENSAOCG00000008448	GGCAGCCTCTTTCTCACC	RT-qPCR
dmrt1_RT-qPCR_R		CCTTAGCCTCGTTTATTTGG
sox8_RT-qPCR_F	ENSAOCG00000002741	GGAGCCGAAAGAGTACCTTG	RT-qPCR
sox8_RT-qPCR_R		CCGCCTGGATGAGTGAAA
amh_RT-qPCR_F	ENSAOCG00000009856	GGCTCGGATATTGGAGATAGTAAG	RT-qPCR
amh_RT-qPCR_R		AGTCGCCTCTGCATGTCGTA
tdrp_RT-qPCR_F	ENSAOCG00000009945	TGGCTGATCGCAGATCTCAC	RT-qPCR
tdrp_RT-qPCR_R		AGTTCCAACGGGACGCTTAG
β-actin_F	/	TGCTGTCCCTGTATGCCTCTGG	RT-qPCR
β-actin_R		GATGTCACGCACGATTTCCCTC
foxl2_5RACE_R1	/	TGACTCATGCCGTTGTAAGAGTT	5'RACE
foxl2_5RACE_R2	/	CTGCGGCGTCTCCTGTAGTTCCCCTT
foxl2_3RACE_F1	/	CGACTGCCTGTTTTCTGTGG	3'RACE
foxl2_3RACE_F2	/	GCTGAGCCCGGCCACCGCGGCAC
dmrt1_5RACE_R1	/	GTGACGGCAAGAGGAGTGGGA	5'RACE
dmrt1_5RACE_R2	/	TTACAGAAACGCTTGTGTCCCTTCAGA
dmrt1_3RACE_F1	/	CGACTGCCTGTTTTCTGTGG	3'RACE
dmrt1_3RACE_F2	/	CTTCTTCAGCCTGGACGACAGCAACA
foxl2_ISH_F	/	CACTGCTCTTACTGGGAACA	ISH
foxl2_ISH_R	/	TGACTTAATTAGGGCATCTT
dmrt1_ISH_F	/	ACTCCCACTCCTCTTGCCGT	ISH
dmrt1_ISH_R	/	ATGTTTTCCTTAGCCTCGTT
