# Supplementary material for: Transcriptome Profiling and Expression Localization of Key Sex-Related Genes in a Socially-Controlled Hermaphroditic Clownfish, Amphiprion clarkii
Source: Int J Mol Sci. 2022 Aug 13;23(16):9085. doi: 10.3390/ijms23169085 (PMC9409170; doi:10.3390/ijms23169085)
Supplement: Supplementary file 1 [file ijms-23-09085-s001.zip › Table S2. Identification of candidate sexual development related genes of A. clarkii.xlsx]

## Sheet: Sheet1
Table S2. Identification of candidate sexual development related genes of A. clarkii
Profile	gene_id	gene_name	gene_description
0	ENSAOCG00000002741	SOX8	PF00505:HMG (high mobility group) box|PF12444:Sox developmental protein N terminal
0	ENSAOCG00000004856	col12a1b	PF00092:von Willebrand factor type A domain|PF01391:Collagen triple helix repeat (20 copies)|PF00041:Fibronectin type III domain
0	ENSAOCG00000015942	bambia	PF06211:BMP and activin membrane-bound inhibitor (BAMBI) N-terminal domain
1	ENSAOCG00000008448	dmrt1	PF12374:Double-sex mab3 related transcription factor 1|PF00751:DM DNA binding domain
1	ENSAOCG00000020854	sox7	PF12067:Sox 17/18 central domain|PF00505:HMG (high mobility group) box
1	ENSAOCG00000023782	foxl2	PF00250:Forkhead domain
1	ENSAOCG00000003673	hsd3b7	PF01073:3-beta hydroxysteroid dehydrogenase/isomerase family
1	ENSAOCG00000017135	pgr-like	PF00105:Zinc finger, C4 type (two domains)|PF00104:Ligand-binding domain of nuclear hormone receptor
1	ENSAOCG00000015900	nr1d2a	PF00105:Zinc finger, C4 type (two domains)|PF00104:Ligand-binding domain of nuclear hormone receptor
1	ENSAOCG00000007723	pgr	PF00105:Zinc finger, C4 type (two domains)|PF00104:Ligand-binding domain of nuclear hormone receptor
1	ENSAOCG00000021967	raraa	PF00104:Ligand-binding domain of nuclear hormone receptor|PF00105:Zinc finger, C4 type (two domains)
1	ENSAOCG00000005135	nr1d4b	PF00105:Zinc finger, C4 type (two domains)|PF00104:Ligand-binding domain of nuclear hormone receptor
1	ENSAOCG00000009104	nr2f2	PF00105:Zinc finger, C4 type (two domains)|PF00104:Ligand-binding domain of nuclear hormone receptor
1	ENSAOCG00000006585	nr2f1a	PF00105:Zinc finger, C4 type (two domains)|PF00104:Ligand-binding domain of nuclear hormone receptor
1	ENSAOCG00000023217	nr0b1	PF00104:Ligand-binding domain of nuclear hormone receptor
1	ENSAOCG00000005008	rxrba	PF11825:Nuclear/hormone receptor activator site AF-1|PF00105:Zinc finger, C4 type (two domains)|PF00104:Ligand-binding domain of nuclear hormone receptor
1	ENSAOCG00000022233	PPARG	PF12577:PPAR gamma N-terminal region|PF00105:Zinc finger, C4 type (two domains)|PF00104:Ligand-binding domain of nuclear hormone receptor
1	ENSAOCG00000003623	nr5a1a	PF00104:Ligand-binding domain of nuclear hormone receptor|PF00105:Zinc finger, C4 type (two domains)
1	ENSAOCG00000005025	nrip1b	PF15688:Nuclear receptor-interacting protein 1 repression 2|PF15687:Nuclear receptor-interacting protein 1 repression 1|PF15690:Nuclear receptor-interacting protein 1 repression 4
1	ENSAOCG00000017118	ar	PF00105:Zinc finger, C4 type (two domains)|PF00104:Ligand-binding domain of nuclear hormone receptor
1	ENSAOCG00000003020	nr2f6b	PF00105:Zinc finger, C4 type (two domains)|PF00104:Ligand-binding domain of nuclear hormone receptor
1	ENSAOCG00000020751	wnt5b	PF00110:wnt family
1	ENSAOCG00000021415	wnt5a	PF00110:wnt family
1	ENSAOCG00000002497	wnt4a	PF00110:wnt family
1	ENSAOCG00000017919	cyp19a1a	PF00067:Cytochrome P450
1	ENSAOCG00000006188	cyp24a1	PF00067:Cytochrome P450
1	ENSAOCG00000005278	cyp2ad3	PF00067:Cytochrome P450
1	ENSAOCG00000017136	adcy9	PF00211:Adenylate and Guanylate cyclase catalytic domain
1	ENSAOCG00000015178	nt5c2b	PF05761:5' nucleotidase family
1	ENSAOCG00000006538	nt5c2l1	PF05761:5' nucleotidase family
1	ENSAOCG00000014932	sertad4	PF06031:SERTA motif
1	ENSAOCG00000000549	col4a1	PF01413:C-terminal tandem repeated domain in type 4 procollagen|PF01391:Collagen triple helix repeat (20 copies)
1	ENSAOCG00000024042	COL6A3	PF00041:Fibronectin type III domain|PF00014:Kunitz/Bovine pancreatic trypsin inhibitor domain|PF01391:Collagen triple helix repeat (20 copies)|PF00092:von Willebrand factor type A domain
1	ENSAOCG00000007590	col5a2a	PF01410:Fibrillar collagen C-terminal domain|PF00093:von Willebrand factor type C domain|PF01391:Collagen triple helix repeat (20 copies)
1	ENSAOCG00000000396	COL4A5	PF01391:Collagen triple helix repeat (20 copies)|PF01413:C-terminal tandem repeated domain in type 4 procollagen
1	ENSAOCG00000007547	col4a6	PF01413:C-terminal tandem repeated domain in type 4 procollagen|PF01391:Collagen triple helix repeat (20 copies)
1	ENSAOCG00000001051	col5a1	PF01391:Collagen triple helix repeat (20 copies)|PF01410:Fibrillar collagen C-terminal domain
1	ENSAOCG00000000607	colec12	PF01391:Collagen triple helix repeat (20 copies)|PF00059:Lectin C-type domain
1	ENSAOCG00000013563	rassf2a	PF16517:Novel Ras effector 1 C-terminal SARAH (Sav/Rassf/Hpo) domain|PF00788:Ras association (RalGDS/AF-6) domain
1	ENSAOCG00000017393	rassf8a	PF00788:Ras association (RalGDS/AF-6) domain
1	ENSAOCG00000015020	bmp3	PF00019:Transforming growth factor beta like domain
1	ENSAOCG00000000621	lipeb	PF07859:alpha/beta hydrolase fold|PF06350:Hormone-sensitive lipase (HSL) N-terminus
1	ENSAOCG00000016418	gng2	-
1	ENSAOCG00000002619	gnb2	PF00400:WD domain, G-beta repeat
1	ENSAOCG00000010302	lamb1b	PF00053:Laminin EGF domain|PF00055:Laminin N-terminal (Domain VI)
1	ENSAOCG00000014985	cldn5a	PF00822:PMP-22/EMP/MP20/Claudin family
1	ENSAOCG00000018455	itga6a	PF08441:Integrin alpha|PF01839:FG-GAP repeat
1	ENSAOCG00000024235	itgb8	PF00362:Integrin beta chain VWA domain|PF17205:Integrin plexin domain
1	ENSAOCG00000004862	itga9	PF08441:Integrin alpha|PF01839:FG-GAP repeat
1	ENSAOCG00000009683	itga4	PF08441:Integrin alpha|PF01839:FG-GAP repeat
1	ENSAOCG00000019520	itgal	PF08441:Integrin alpha|PF00092:von Willebrand factor type A domain
1	ENSAOCG00000008955	col4a2	PF01391:Collagen triple helix repeat (20 copies)|PF01413:C-terminal tandem repeated domain in type 4 procollagen
1	ENSAOCG00000006029	lama2	PF00054:Laminin G domain|PF02210:Laminin G domain
1	ENSAOCG00000000563	nrxn1	PF02210:Laminin G domain|PF01034:Syndecan domain|PF00008:EGF-like domain
1	ENSAOCG00000014262	adma	PF00214:Calcitonin / CGRP / IAPP family
1	ENSAOCG00000014256	hexb	PF14845:beta-acetyl hexosaminidase like|PF00728:Glycosyl hydrolase family 20, catalytic domain
1	ENSAOCG00000013873	galnt1	PF00535:Glycosyl transferase family 2|PF00652:Ricin-type beta-trefoil lectin domain
1	ENSAOCG00000006861	wnt2ba	PF00110:wnt family
1	ENSAOCG00000011034	fn1b	PF00040:Fibronectin type II domain|PF00039:Fibronectin type I domain|PF00041:Fibronectin type III domain
1	ENSAOCG00000006549	vclb	PF01044:Vinculin family
1	ENSAOCG00000003392	vcla	PF01044:Vinculin family
1	ENSAOCG00000017736	galnt13	PF00535:Glycosyl transferase family 2|PF00652:Ricin-type beta-trefoil lectin domain
1	ENSAOCG00000019907	cldn11a	PF00822:PMP-22/EMP/MP20/Claudin family
1	ENSAOCG00000022181	cldn15a	PF00822:PMP-22/EMP/MP20/Claudin family
1	ENSAOCG00000023796	agrn	PF01390:SEA domain|PF00054:Laminin G domain|PF00053:Laminin EGF domain|PF07648:Kazal-type serine protease inhibitor domain|PF03146:Agrin NtA domain|PF00050:Kazal-type serine protease inhibitor domain|PF00008:EGF-like domain
2	ENSAOCG00000002954	sox6	PF00505:HMG (high mobility group) box
2	ENSAOCG00000023977	nr2f5	PF00105:Zinc finger, C4 type (two domains)|PF00104:Ligand-binding domain of nuclear hormone receptor
2	ENSAOCG00000021135	rorcb	PF00105:Zinc finger, C4 type (two domains)|PF00104:Ligand-binding domain of nuclear hormone receptor
2	ENSAOCG00000019342	nr0b2a	PF00104:Ligand-binding domain of nuclear hormone receptor
2	ENSAOCG00000018047	wnt9b	PF00110:wnt family
2	ENSAOCG00000012056	cyp1c2 (1 of many)	PF00067:Cytochrome P450
2	ENSAOCG00000012048	cyp1c2 (1 of many)	PF00067:Cytochrome P450
2	ENSAOCG00000009982	col6a1	PF00092:von Willebrand factor type A domain|PF01391:Collagen triple helix repeat (20 copies)
2	ENSAOCG00000004004	col12a1a	PF00092:von Willebrand factor type A domain|PF01391:Collagen triple helix repeat (20 copies)|PF00041:Fibronectin type III domain
2	ENSAOCG00000013209	COL8A1	PF01391:Collagen triple helix repeat (20 copies)|PF00386:C1q domain
2	ENSAOCG00000001770	pgrmc1	-
2	ENSAOCG00000010842	fstl1b	PF07648:Kazal-type serine protease inhibitor domain|PF09289:Follistatin/Osteonectin-like EGF domain
2	ENSAOCG00000017463	rassf9	-
2	ENSAOCG00000013413	rassf8b	PF00788:Ras association (RalGDS/AF-6) domain
2	ENSAOCG00000006550	spata2	-
2	ENSAOCG00000018489	klhl4	PF07707:BTB And C-terminal Kelch|PF01344:Kelch motif|PF00651:BTB/POZ domain
2	ENSAOCG00000008419	GNB4	PF00400:WD domain, G-beta repeat
2	ENSAOCG00000022511	lama5	PF00055:Laminin N-terminal (Domain VI)|PF02210:Laminin G domain|PF06008:Laminin Domain I|PF00054:Laminin G domain|PF06009:Laminin Domain II|PF00053:Laminin EGF domain|PF00052:Laminin B (Domain IV)
2	ENSAOCG00000008570	lama4	PF06009:Laminin Domain II|PF02210:Laminin G domain|PF06008:Laminin Domain I|PF00053:Laminin EGF domain
2	ENSAOCG00000000100	smad3b	PF03166:MH2 domain|PF03165:MH1 domain
2	ENSAOCG00000018316	tln1	PF16511:N-terminal or F0 domain of Talin-head FERM|PF09141:Talin, middle domain|PF09379:FERM N-terminal domain|PF08913:Vinculin Binding Site|PF01608:I/LWEQ domain|PF00373:FERM central domain
2	ENSAOCG00000010796	itgb4	PF17205:Integrin plexin domain|PF07965:Integrin beta tail domain|PF03160:Calx-beta domain|PF00362:Integrin beta chain VWA domain|PF00041:Fibronectin type III domain
2	ENSAOCG00000014185	col6l	PF01391:Collagen triple helix repeat (20 copies)|PF00092:von Willebrand factor type A domain
2	ENSAOCG00000017624	adml	PF00214:Calcitonin / CGRP / IAPP family
2	ENSAOCG00000003472	galnt7	PF00652:Ricin-type beta-trefoil lectin domain|PF00535:Glycosyl transferase family 2
3	ENSAOCG00000019703	cyp11c1	PF00067:Cytochrome P450
3	ENSAOCG00000003215	rassf1	PF00130:Phorbol esters/diacylglycerol binding domain (C1 domain)|PF00788:Ras association (RalGDS/AF-6) domain|PF16517:Novel Ras effector 1 C-terminal SARAH (Sav/Rassf/Hpo) domain
3	ENSAOCG00000002436	skib	PF08782:c-SKI Smad4 binding domain|PF02437:SKI/SNO/DAC family
3	ENSAOCG00000002892	prlh2	PF15172:Prolactin-releasing peptide
3	ENSAOCG00000012981	stanniocalcin	PF03298:Stanniocalcin family
4	ENSAOCG00000009856	amh	PF00019:Transforming growth factor beta like domain|PF04709:Anti-Mullerian hormone, N terminal region
4	ENSAOCG00000018714	nr0b1l	PF00104:Ligand-binding domain of nuclear hormone receptor
4	ENSAOCG00000020923	cyp51	PF00067:Cytochrome P450
4	ENSAOCG00000002944	cyp2r1	PF00067:Cytochrome P450
4	ENSAOCG00000012501	adcy8	PF00211:Adenylate and Guanylate cyclase catalytic domain|PF06327:Domain of Unknown Function (DUF1053)
4	ENSAOCG00000017484	izumo1	PF15005:Izumo sperm-egg fusion, Ig domain-associated|PF16706:Izumo-like Immunoglobulin domain
4	ENSAOCG00000019587	drc1	PF14775:Sperm tail C-terminal domain|PF14772:Sperm tail
4	ENSAOCG00000012796	KLHL10	PF01344:Kelch motif|PF00651:BTB/POZ domain|PF07707:BTB And C-terminal Kelch
5	ENSAOCG00000006262	sox32	PF00505:HMG (high mobility group) box
5	ENSAOCG00000017841	gtf3ab	-
5	ENSAOCG00000005532	wnt7bb	PF00110:wnt family
5	ENSAOCG00000020878	cyp17a2	PF00067:Cytochrome P450
5	ENSAOCG00000009945	tdrp	PF15683:Testis development-related protein
